# Supplementary material
Source: ML conference proceedings conference paper supplement (https://openreview.net/forum?id=Tz-S4nQW2Vm)

DMC CMC OnMC-S OnMC-B

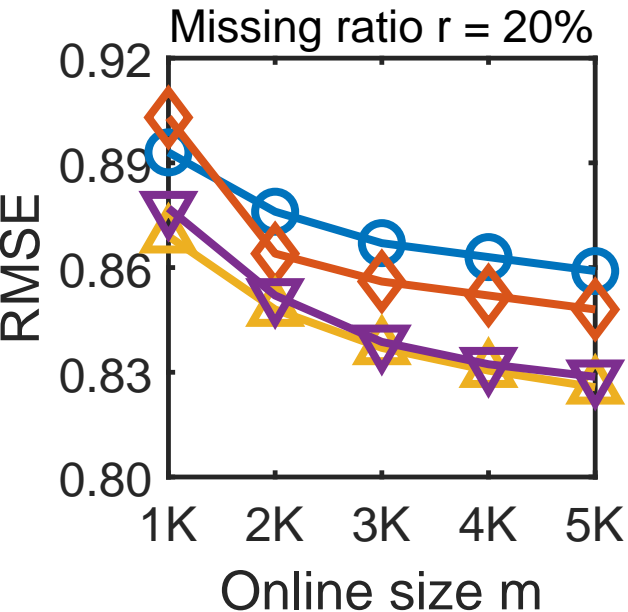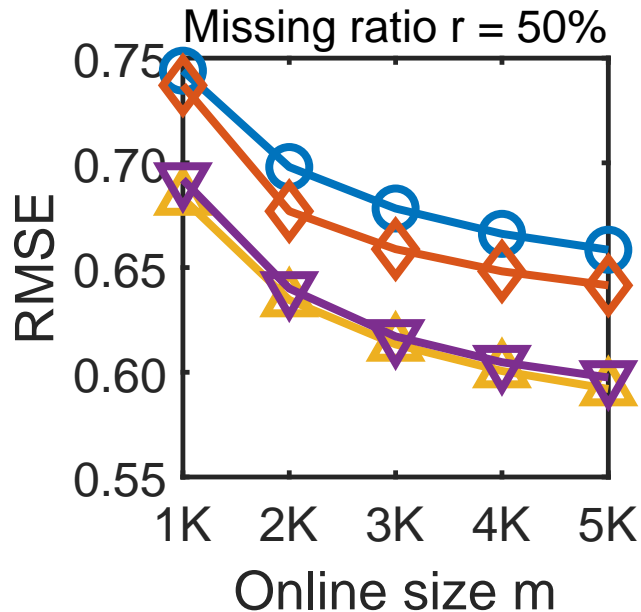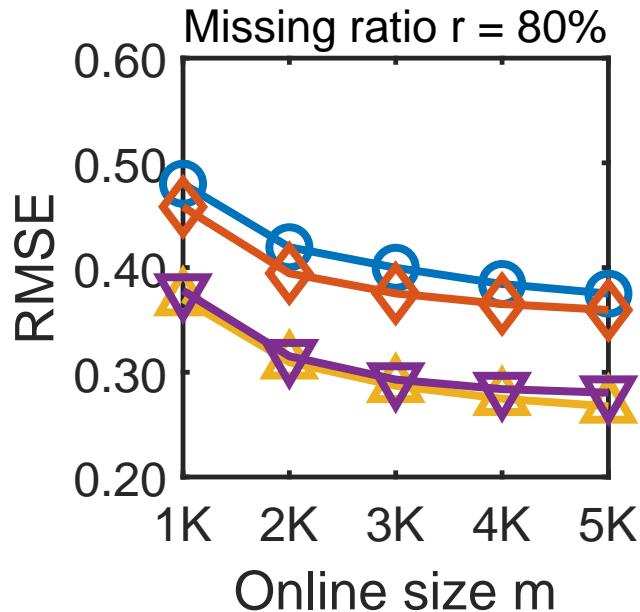

Supplement: supplementary_material [file attachment]

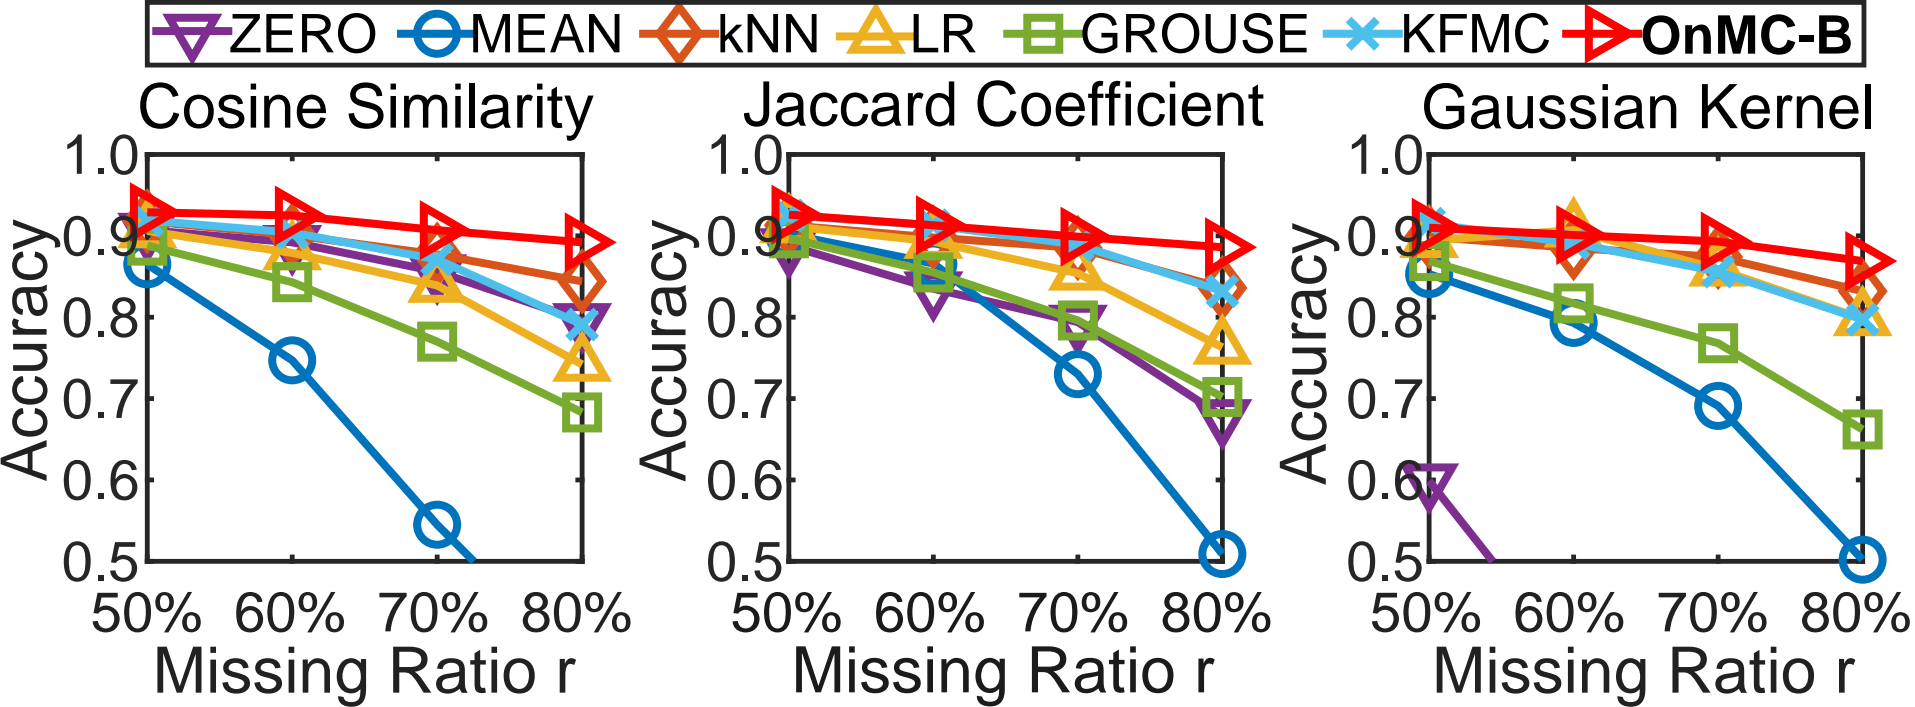

Supplement: supplementary_material [file attachment]

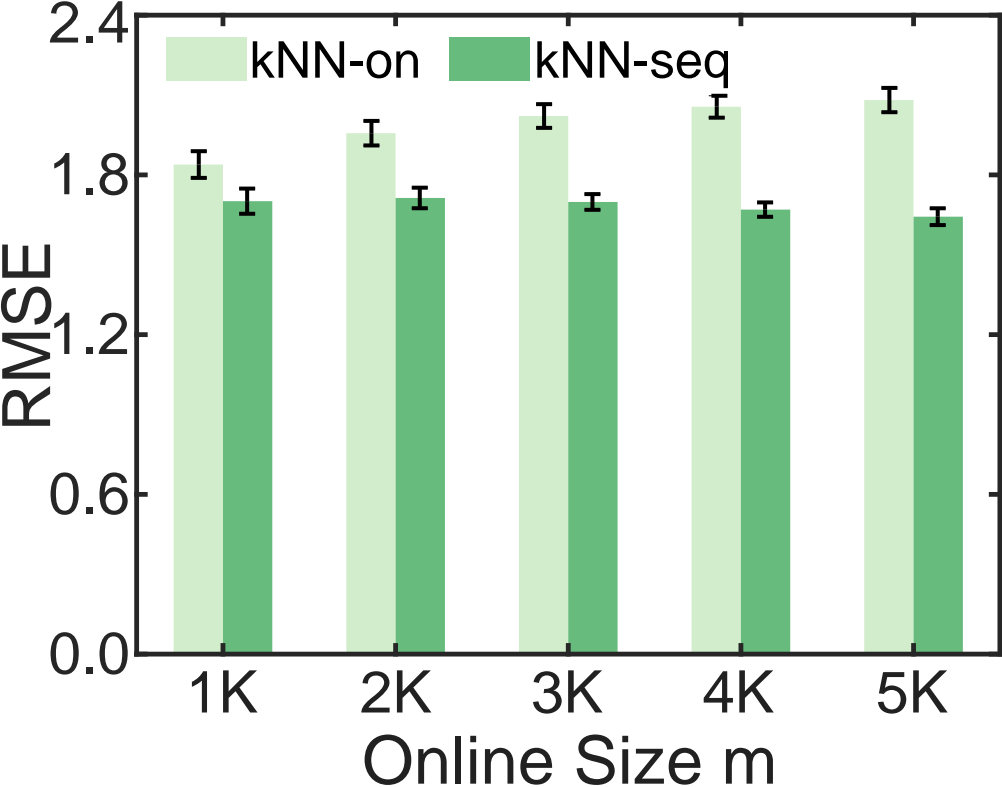

Supplement: supplementary_material [file attachment]

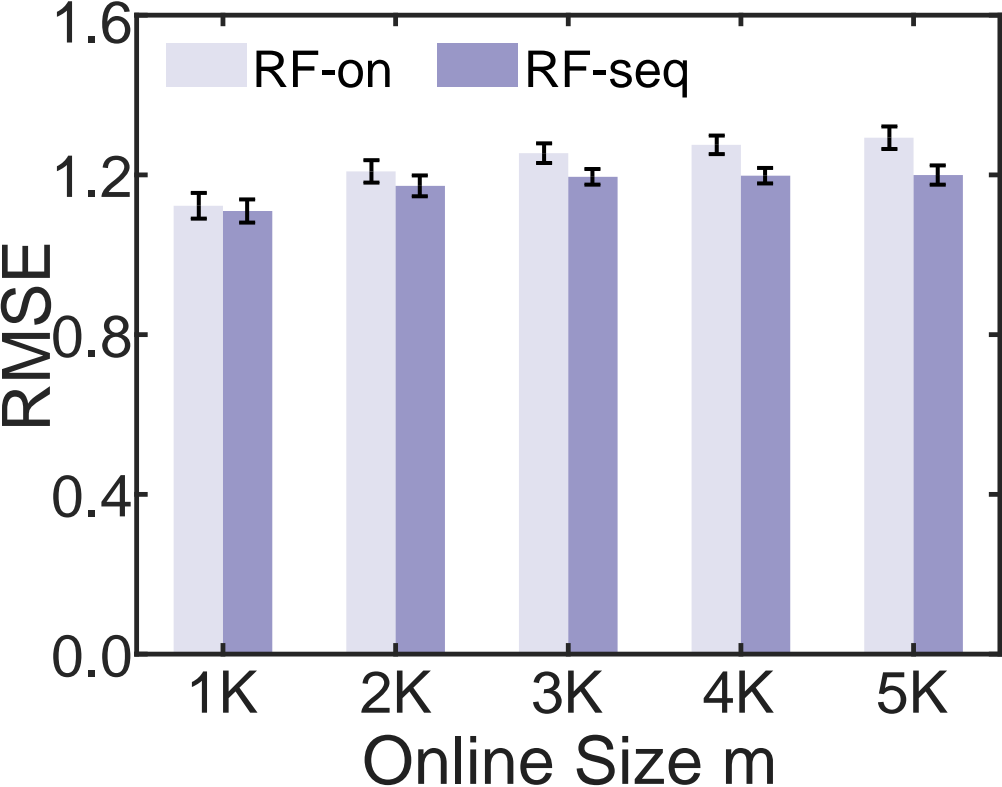

Supplement: supplementary_material [file attachment]

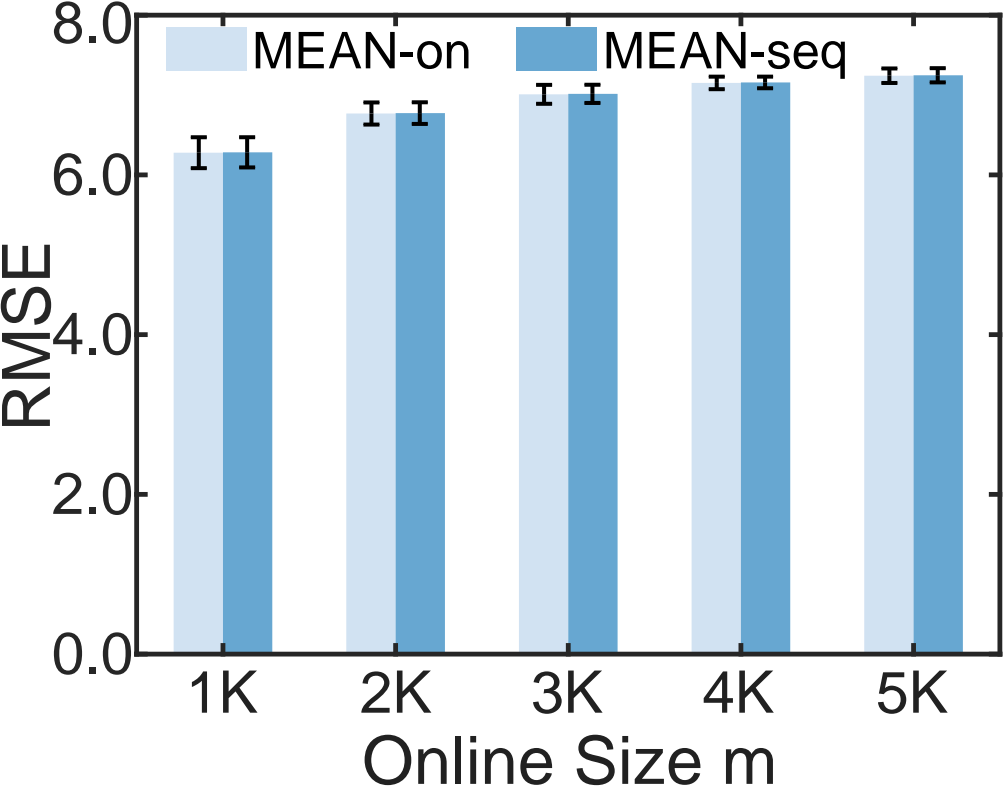

Supplement: supplementary_material [file attachment]

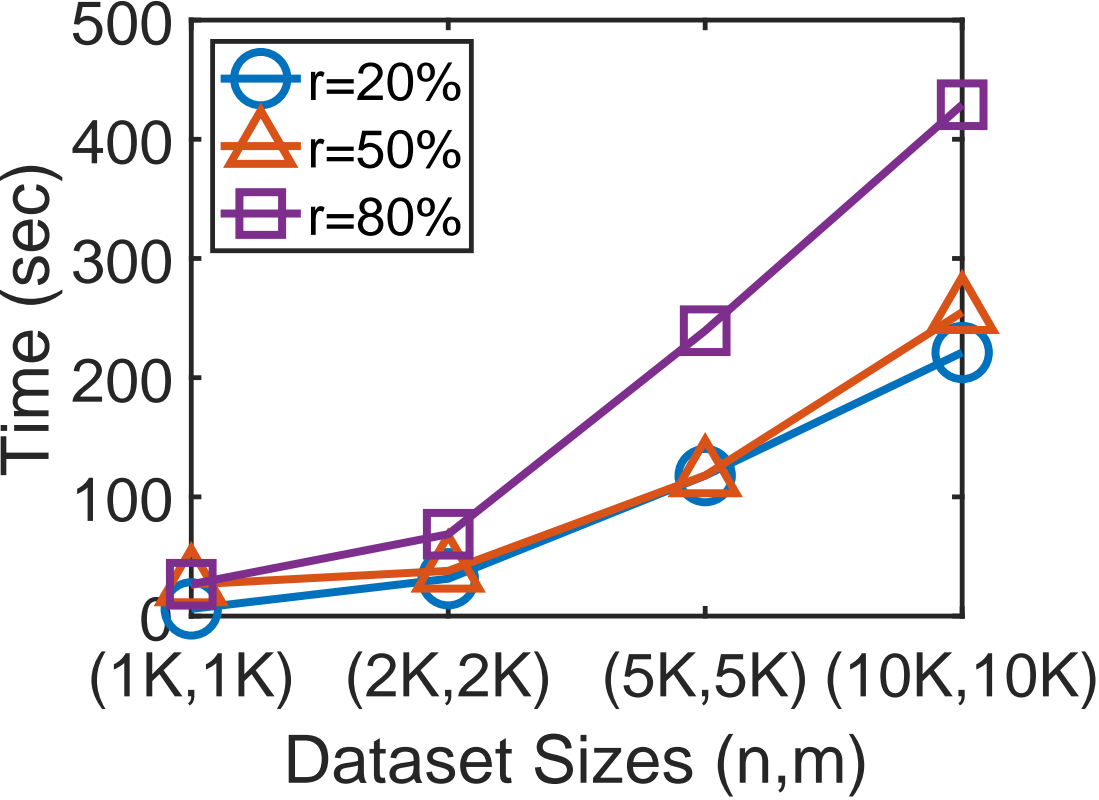

Supplement: supplementary_material [file attachment]

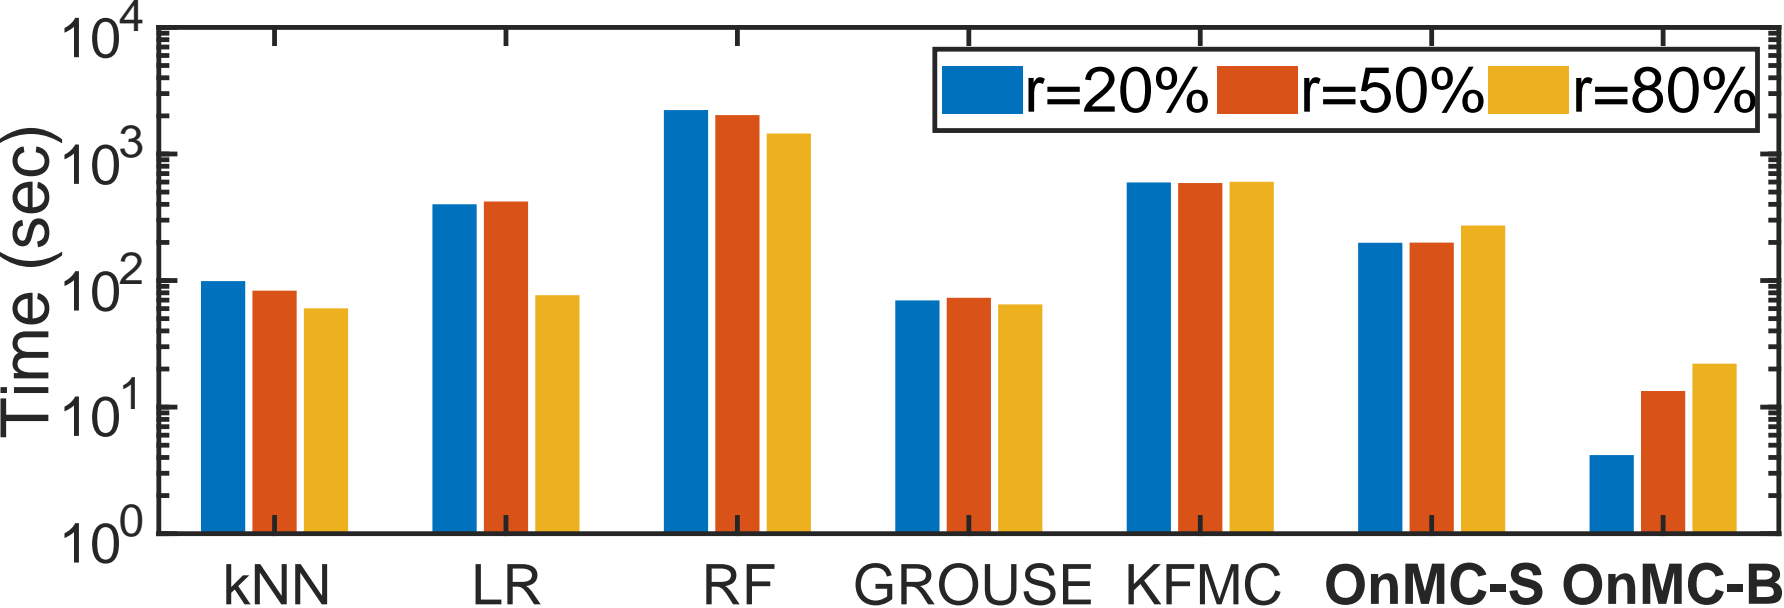

Supplement: supplementary_material [file attachment]

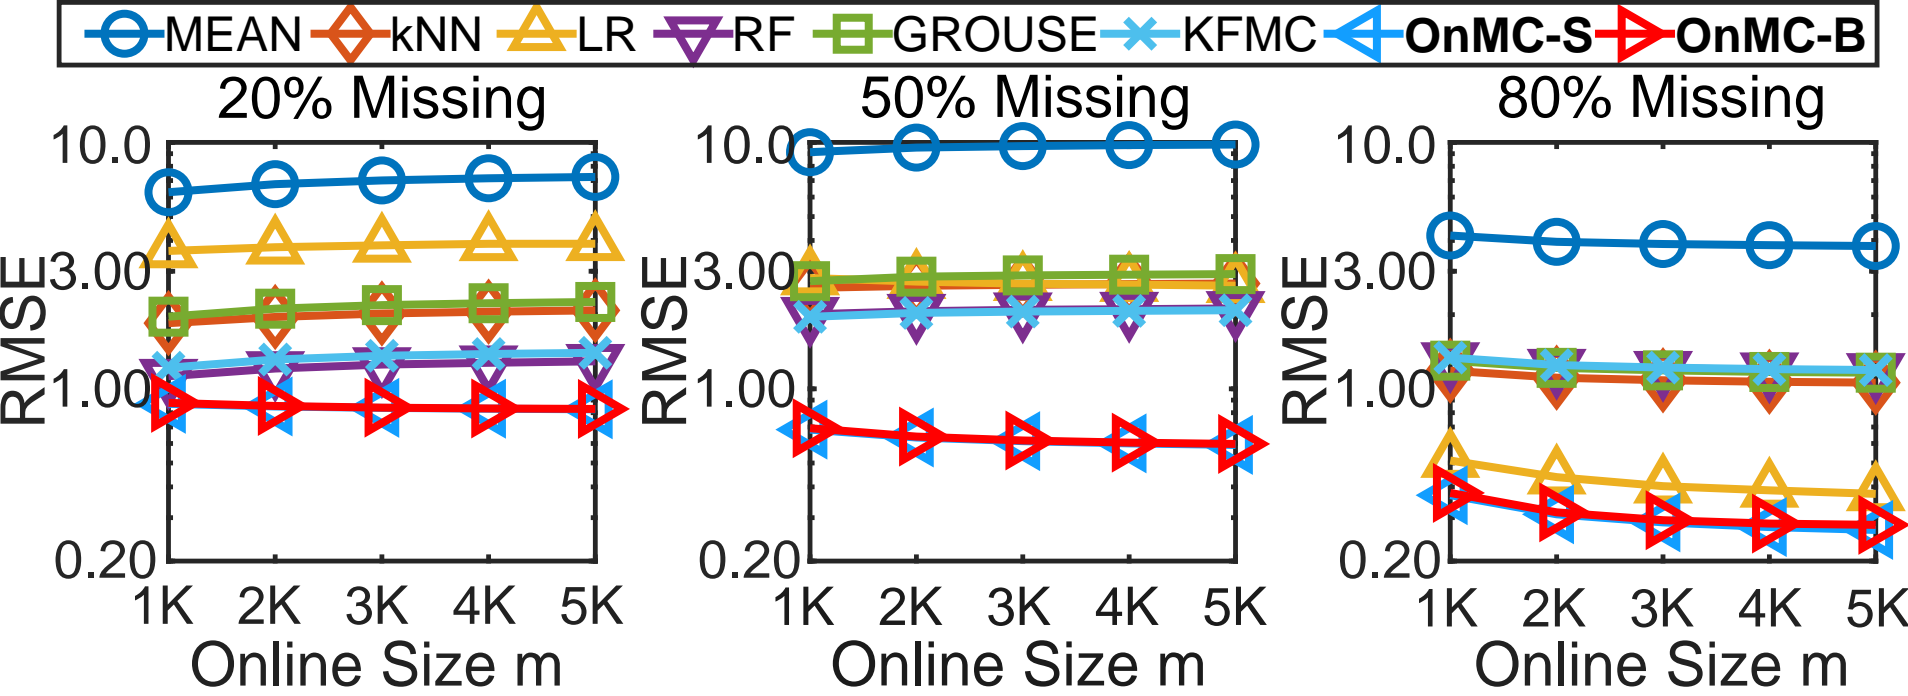

Supplement: supplementary_material [file attachment]

k nearest neighbors

RMSE

6.0

4.0

2.0

0.0

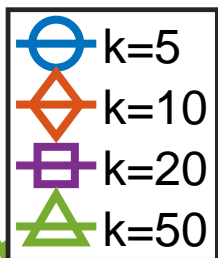

40%

60%

80%

Missing Ratio  $r$

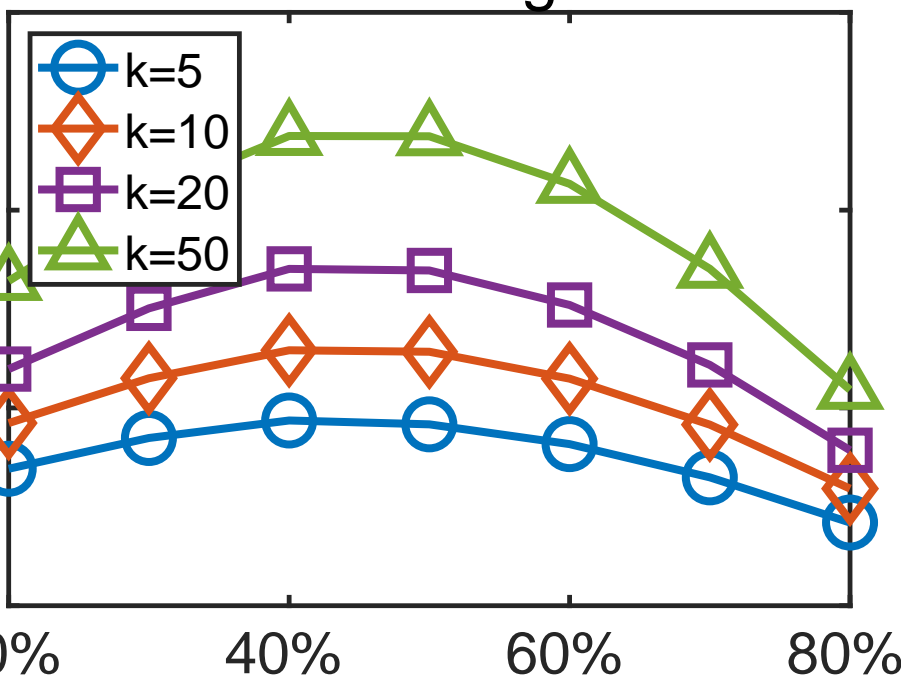

Supplement: supplementary_material [file attachment]

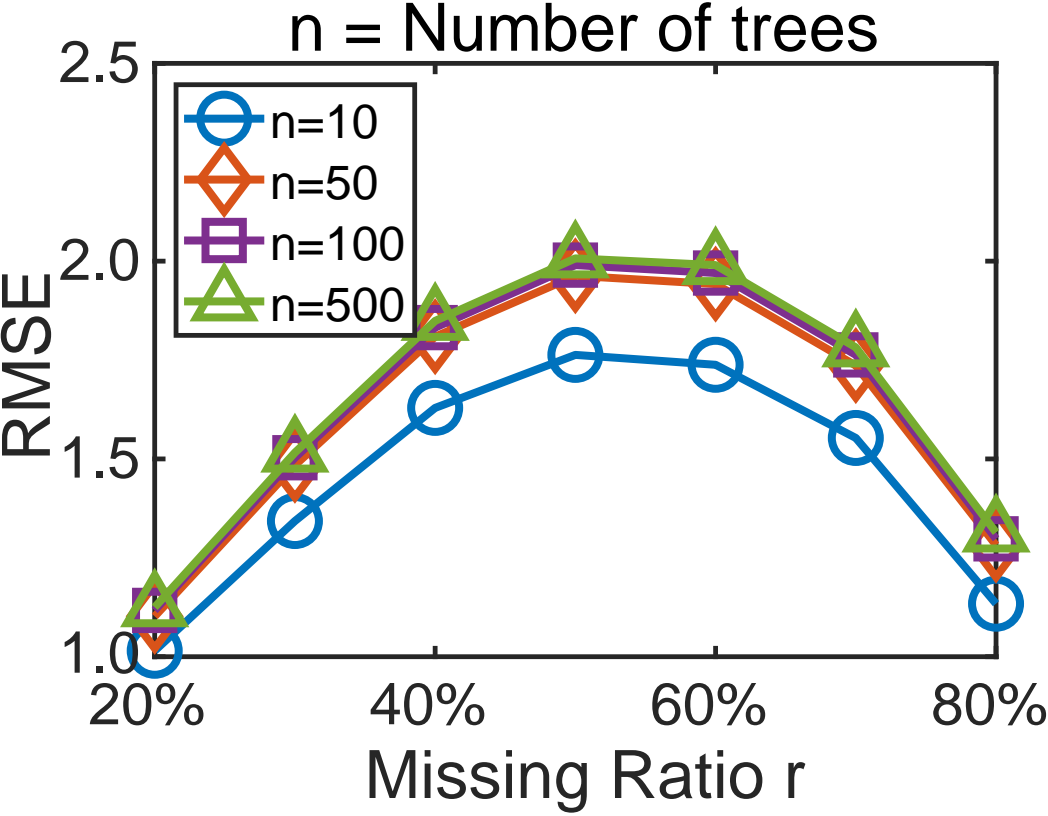

Supplement: supplementary_material [file attachment]

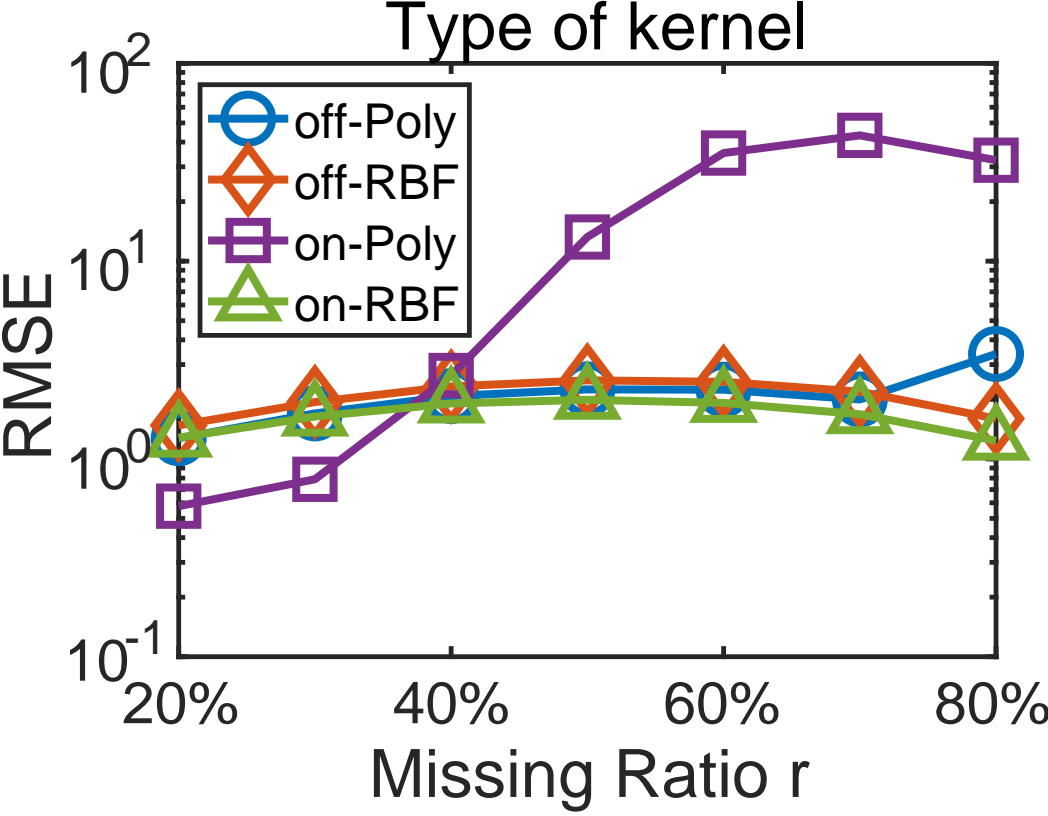

Supplement: supplementary_material [file attachment]

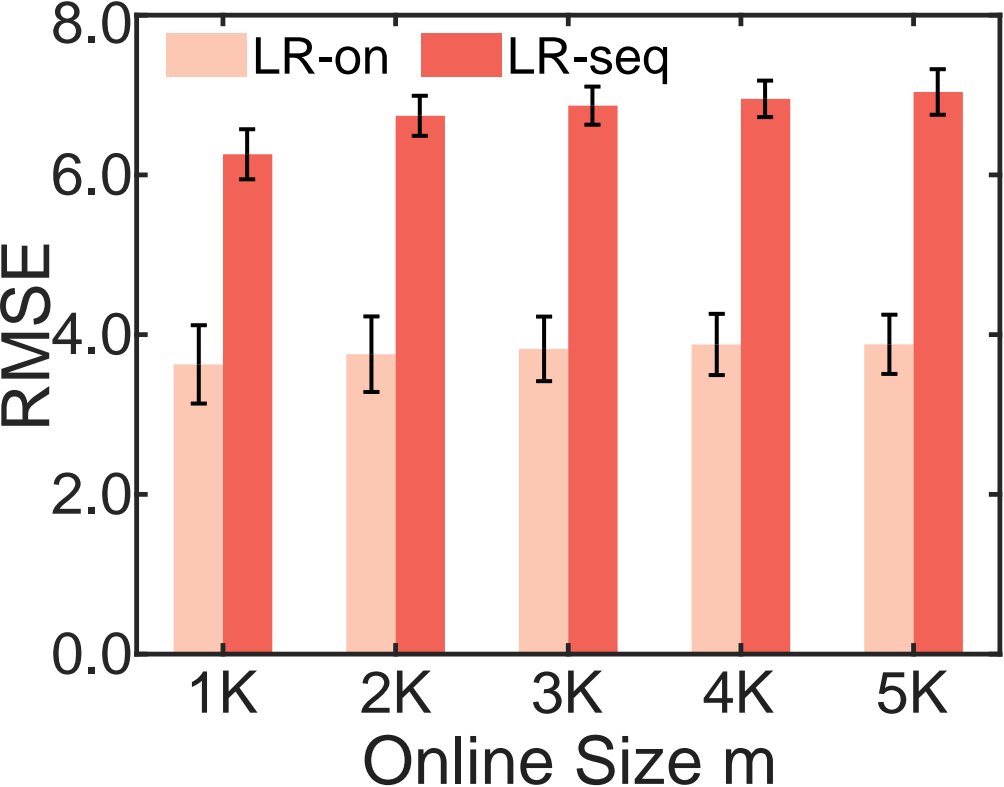

Supplement: supplementary_material [file attachment]

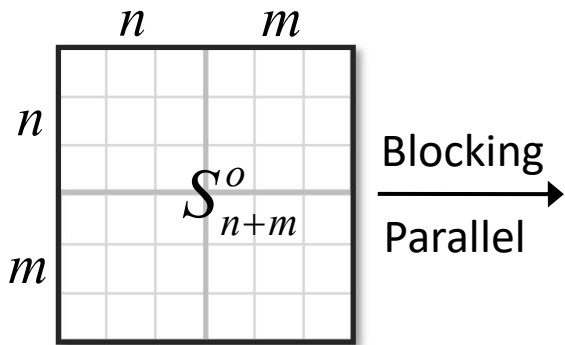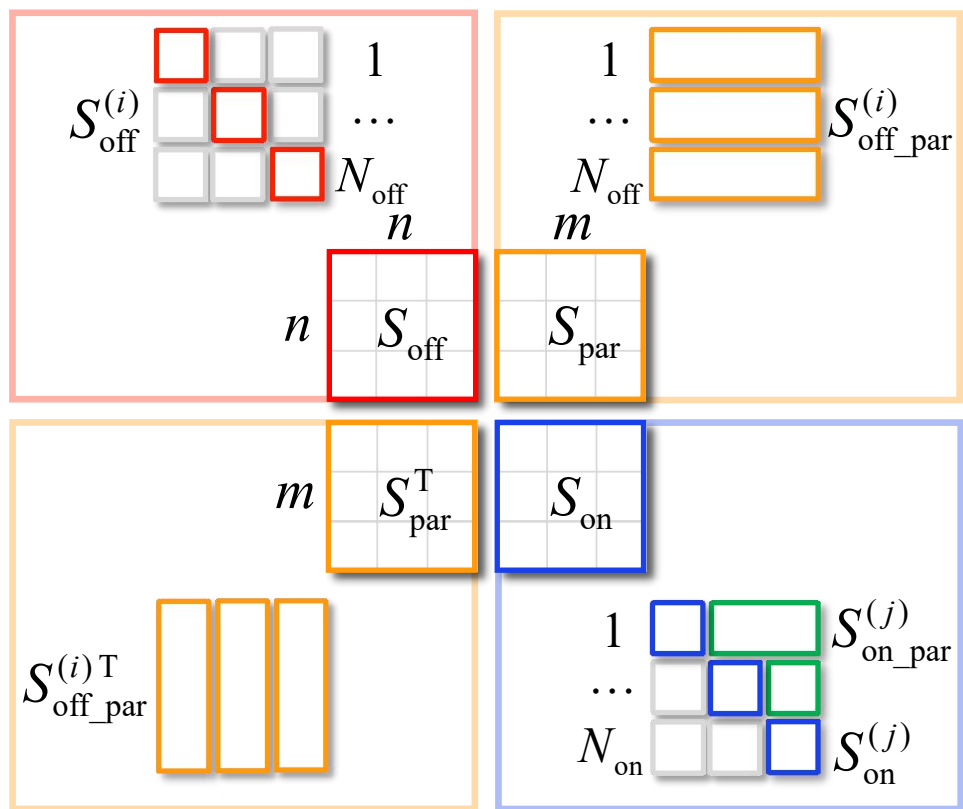

Supplement: supplementary_material [file attachment]

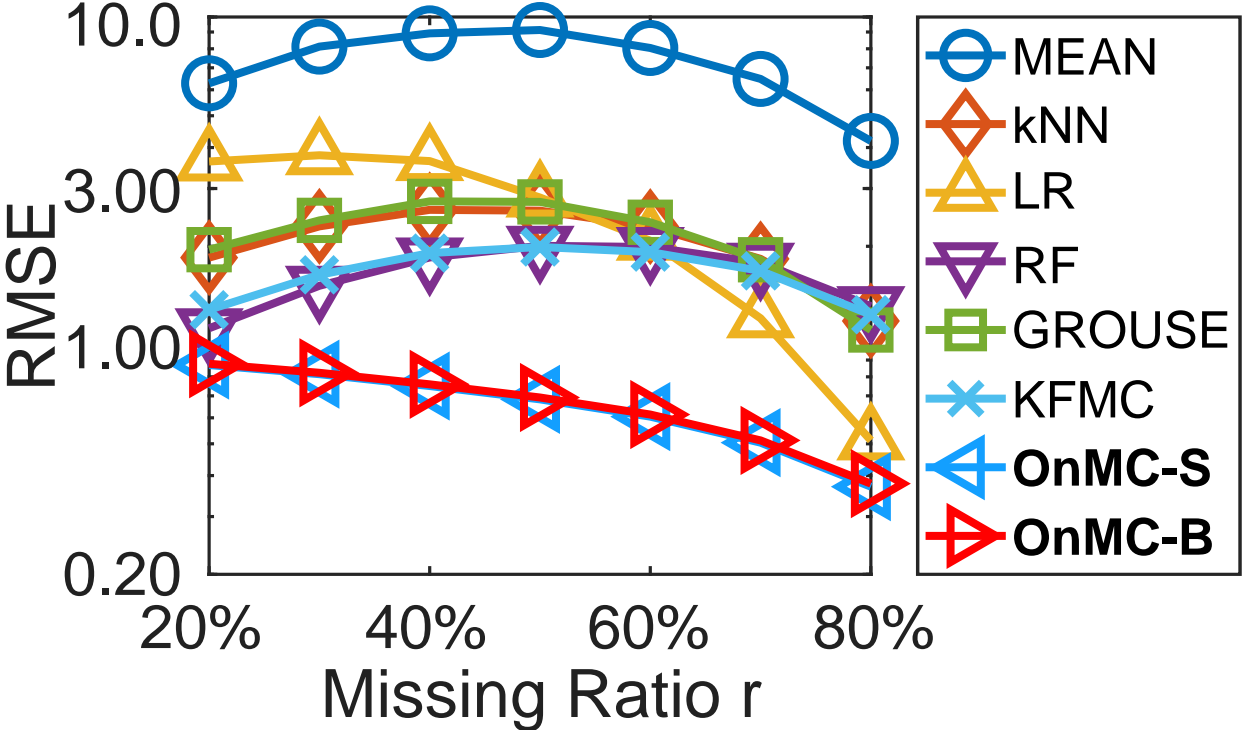

Supplement: supplementary_material [file attachment]

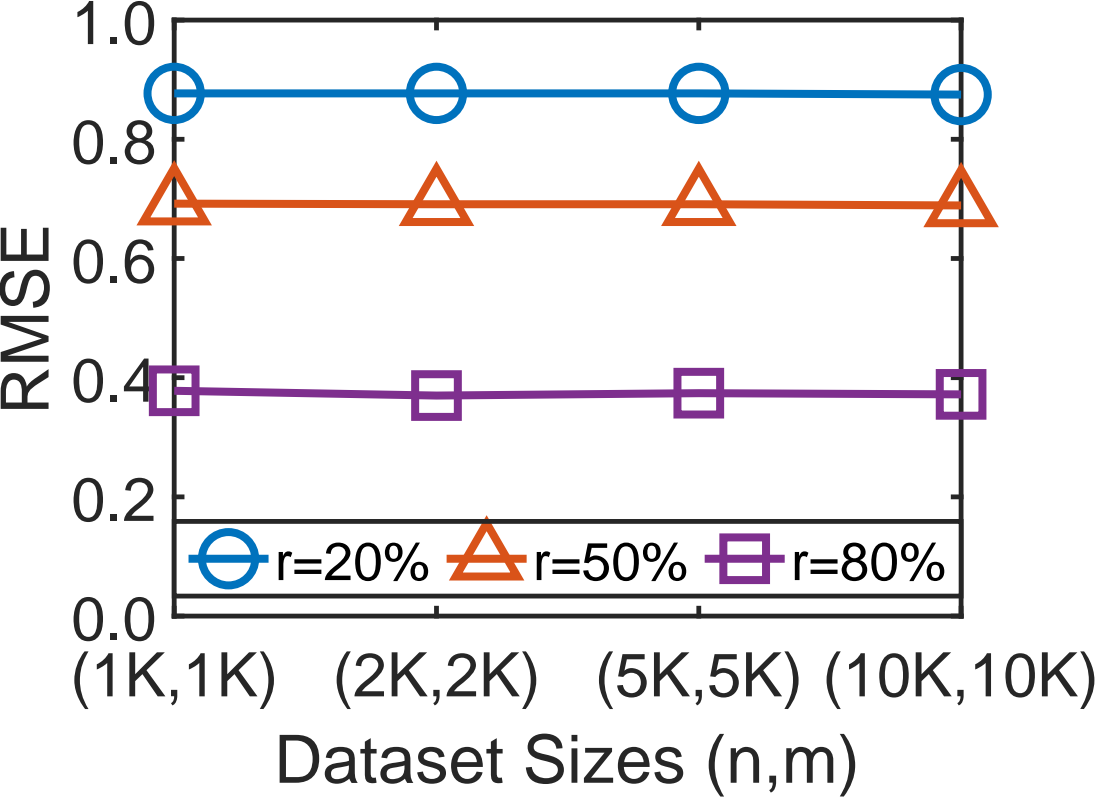

Supplement: supplementary_material [file attachment]
